# Supplementary material for: The Complete Chloroplast Genomes of Six Ipomoea Species and Indel Marker Development for the Discrimination of Authentic Pharbitidis Semen (Seeds of I. nil or I. purpurea)
Source: PubMed Central journal article supplement (PMC6041466; doi:10.3389/fpls.2018.00965), 2018-07-05
Supplement: Image_1.pdf [file Image_1.pdf]

*Supplementary Material*

**The Complete Chloroplast Genomes of Six *Ipomoea* Species and Indel Marker Development for the Discrimination of Authentic Pharbitidis Semen (seeds of *I. nil* or *I. purpurea*)**

**Inkyu Park, Sungyu Yang, Wook Jin Kim, Pureum Noh, Hyun Oh Lee, Byeong Cheol Moon\***

**\*Correspondence:** Byeong-Cheol Moon: [bcmoon@kiom.re.kr](mailto:bcmoon@kiom.re.kr)

**Supplementary Figures and Tables**

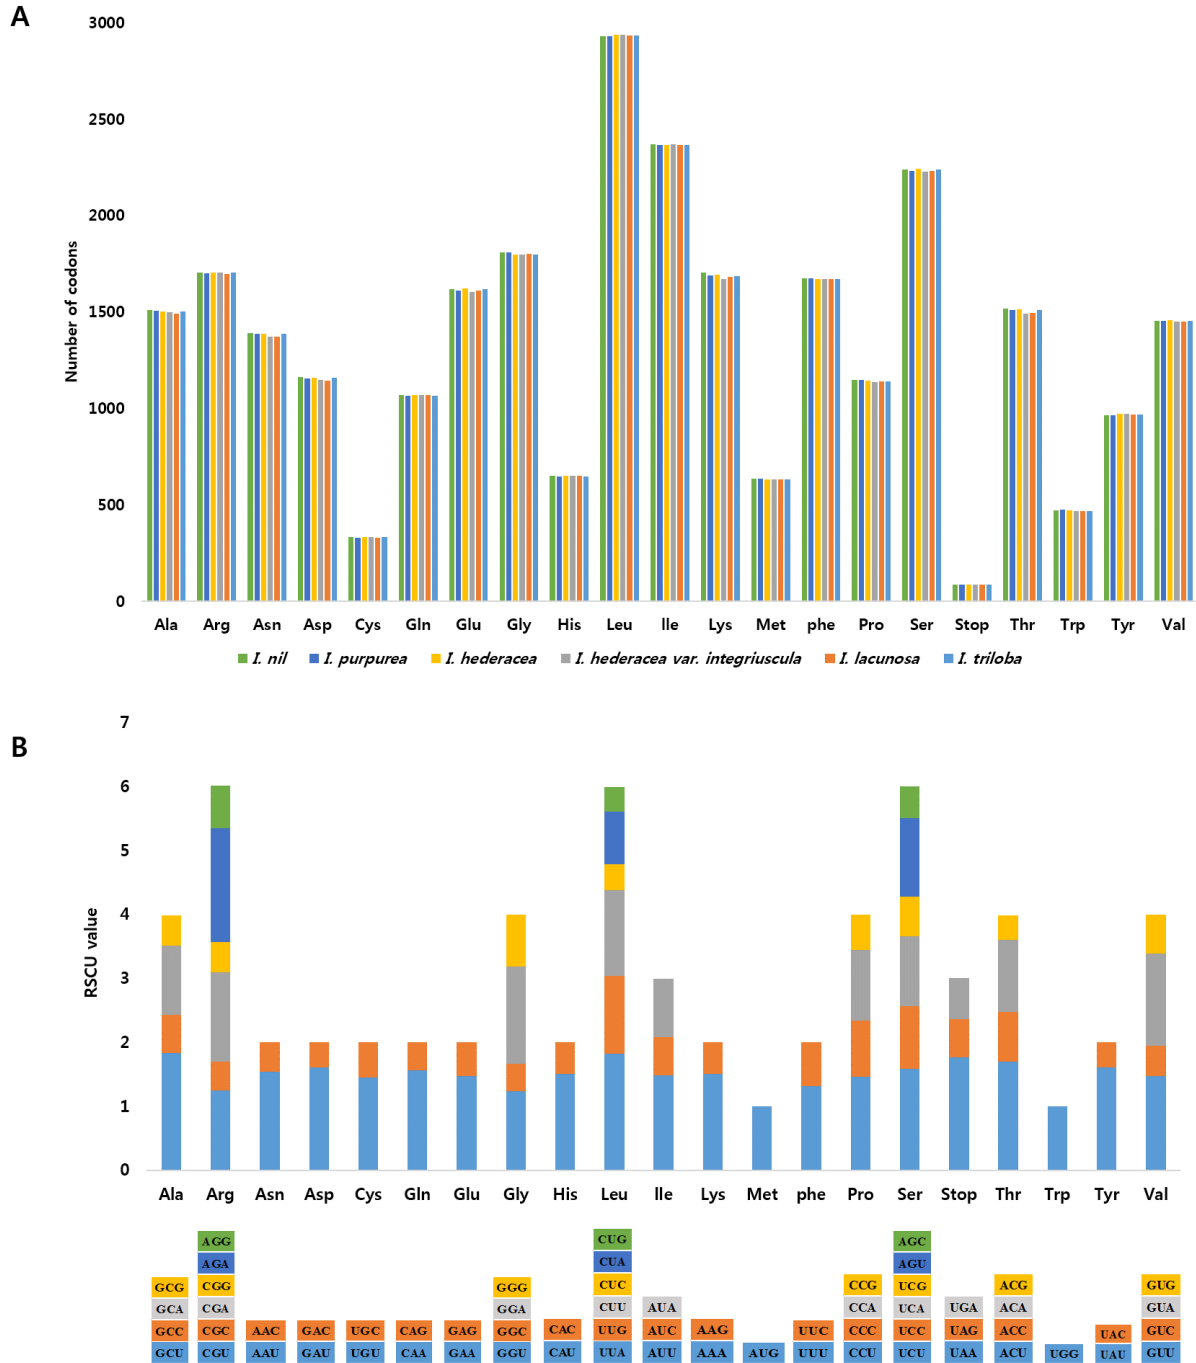

**Figure S1 Codon frequencies and RSCU values for six *Ipomoea* chloroplast genomes. (A)** Amino acid frequencies for protein-coding sequences. **(B)** Codon usage for 20 amino acids and stop codons in 78 protein-coding genes.

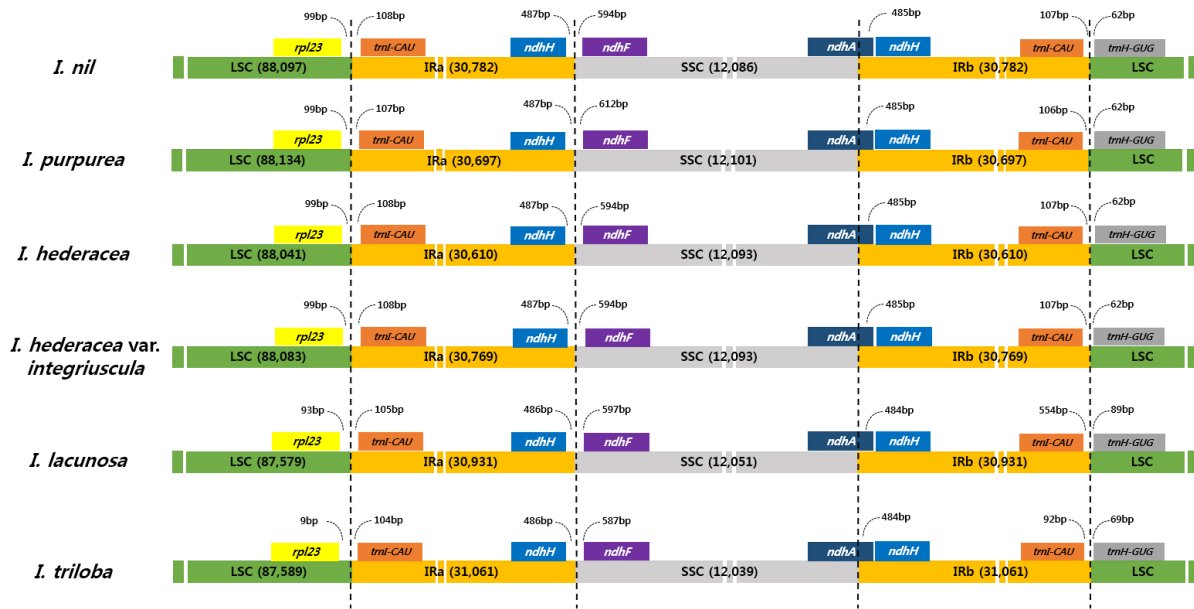

**Figure S2 Comparison of the LSC, IR, and SSC junction positions in six *Ipomoea* chloroplast genomes.**

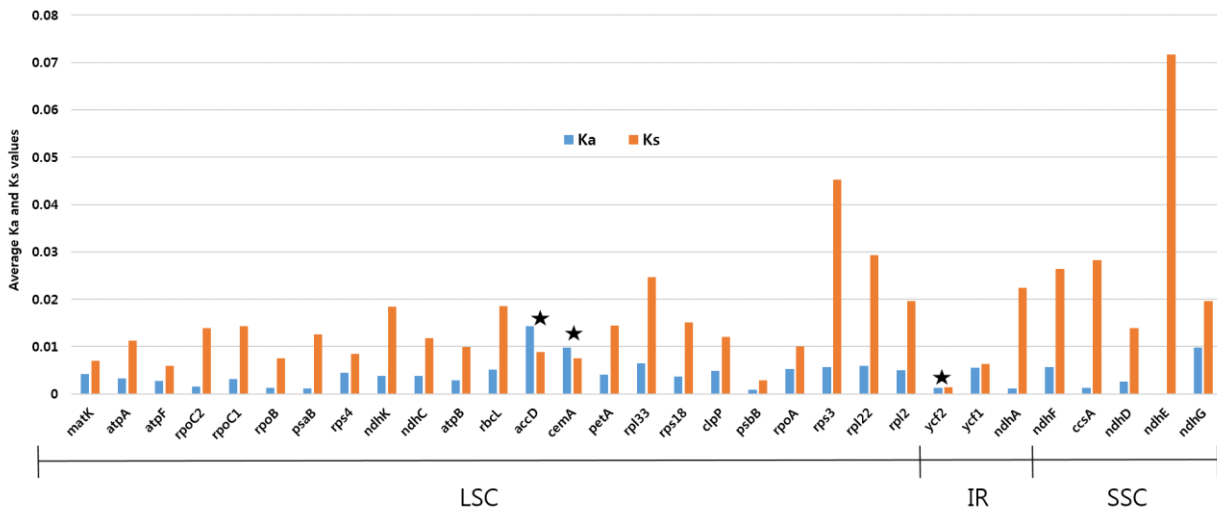

**Figure S3 Ka and Ks values for six *Ipomoea* cp genomes.** The ratios of non-synonymous substitution (Ka) to synonymous substitution (Ks) were calculated for 78 conserved protein-coding sequences. Genes with Ka or Ks = 0 are not shown. Average Ka and Ks values are shown in blue and orange, respectively. Black stars indicate genes undergoing positive selection (Ka/Ks > 1) among the six *Ipomoea* species.

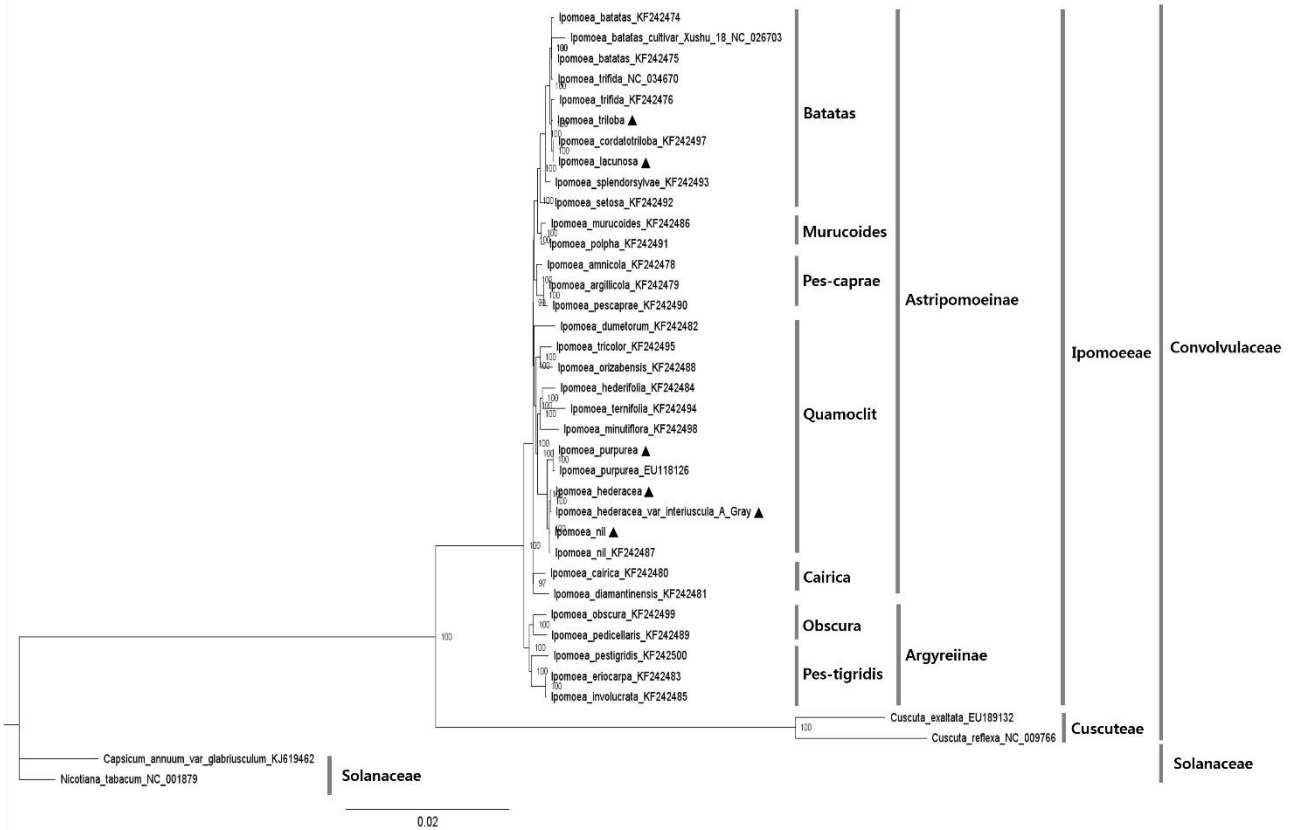

**Figure S4** Phylogenetic tree based on 48 protein-coding genes from six *Ipomoea* and 28 *Ipomoea* species using Bayesian posterior probabilities (PP).

## ITS2

| Nucleotide-position                             | 117 | 133 | 156 | 190 | 380-382 | 435 | 460 | 470 | 498 | 519 | 537 | 556 | 558-559 | 560 | 569 |
|-------------------------------------------------|-----|-----|-----|-----|---------|-----|-----|-----|-----|-----|-----|-----|---------|-----|-----|
| <i>I. nil</i>                                   | C   | G   | T   | C   | CCT     | C   | T   | C   | C   | C   | G   | C   | GT      | C   | C   |
| <i>I. purpurea</i>                              | C   | C   | T   | T   | GAG     | T   | C   | T   | T   | G   | A   | T   | AG      | C   | T   |
| <i>I. hederacea</i>                             | C   | G   | T   | C   | CCT     | C   | T   | C   | C   | C   | G   | C   | GT      | C   | C   |
| <i>I. hederacea</i><br>var. <i>integriscula</i> | C   | G   | T   | C   | CCT     | C   | T   | C   | C   | C   | G   | C   | GT      | C   | C   |
| <i>I. lacunosa</i>                              | A   | G   | C   | C   | CCT     | C   | T   | C   | C   | C   | G   | C   | GT      | T   | C   |
| <i>I. triloba</i>                               | T   | G   | G   | C   | CCT     | C   | T   | C   | C   | C   | G   | C   | GT      | C   | C   |

## matK

| Nucleotide-position                             | 1155 | 1157-1158 |
|-------------------------------------------------|------|-----------|
| <i>I. nil</i>                                   | G    | GT        |
| <i>I. purpurea</i>                              | G    | AC        |
| <i>I. hederacea</i>                             | A    | GT        |
| <i>I. hederacea</i><br>var. <i>integriscula</i> | A    | GT        |
| <i>I. lacunosa</i>                              | G    | GT        |
| <i>I. triloba</i>                               | G    | GT        |

**Figure S5 Schematic diagram showing DNA barcode analysis of six *Ipomoea* species using universal DNA barcode primers for ITS2 (ITS-s2f, ITS4) and *matK* (matK-AF, matK-8R).**

**Table S1 Germplasms used in this study**

| No | Species                   | Collection information                                    | Voucher number   | Complete chloroplast genome | IPOT Y test | IPO-YCF1 test |
|----|---------------------------|-----------------------------------------------------------|------------------|-----------------------------|-------------|---------------|
| 1  |                           | Namyang-myeon, Goheung-gun, Jeollanam-do, Korea           | KIOM201701018913 | o                           | o           | o             |
| 2  |                           | Hallim-eup, Jeju-si, Jeju, Korea                          | KIOM201601017919 |                             | o           | o             |
| 3  | <i>I. nil</i>             | Jeonmin-dong, Yuseong-gu, Daejeon, Korea                  | KIOM-2017-78     |                             | o           |               |
| 4  |                           | Gujeuk-dong, Yuseong-gu, Daejeon, Korea                   | KIOM-2016-333    |                             | o           |               |
| 5  |                           | Dongi-myeon, Okcheon-gun, Chungcheongbuk-do, Korea        | KIOM201501012234 |                             | o           |               |
| 6  |                           | Namyang-myeon, Goheung-gun, Jeollanam-do, Korea           | KIOM201701018916 | o                           | o           | o             |
| 5  |                           | Dongseo-dong, Sacheon-si, Gyeongsangnam-do, Korea         | KIOM201601018515 |                             | o           | o             |
| 6  | <i>I. purpurea</i>        | Jasan-ri, Donghyang-myeon, Jinan-gun, Jeollabuk-do, Korea | KIOM201701018871 |                             | o           | o             |
| 7  |                           | Bongsan-dong, Yuseong-gu, Daejeon, Korea                  | KIOM201701018883 |                             | o           | o             |
| 8  |                           | Jugwang-myeon, Goseong-gun, Gangwon-do, Korea             | KIOM-2016-315    |                             | o           | o             |
| 9  |                           | Boan-myeon, Buan-gun, Jeollabuk-do, Korea                 | KIOM201701018893 |                             |             | o             |
| 10 |                           | Namyang-myeon, Goheung-gun, Jeollanam-do, Korea           | KIOM201701018903 | o                           | o           | o             |
| 11 | <i>I. hederacea</i>       | Gwanpyeong-dong, Yuseong-gu, Daejeon, Korea               | KIOM201601018486 |                             | o           | o             |
| 12 | <i>a</i>                  | Ochang-eup, Cheongju-si, Chungcheongbuk-do, Korea         | KIOM201701018855 |                             | o           | o             |
| 13 |                           | Gonyang-myeon, Sacheon-si, Gyeongsangnam-do, Korea        | KIOM-2016-322    |                             | o           | o             |
| 14 | <i>I. hederacea</i>       | Namyang-myeon, Goheung-gun, Jeollanam-do, Korea           | KIOM201701018905 | o                           | o           | o             |
| 15 |                           | Hallim-eup, Jeju-si, Jeju, Korea                          | KIOM201601017921 |                             | o           | o             |
| 16 | var. <i>integriuscula</i> | Hajodae, Yangyang-gun, Gangwon-do, Korea                  | KIOM-2016-317    |                             | o           | o             |
| 17 |                           | Gahoe-myeon, Hapcheon-gun, Gyeongsangnam-do, Korea        | KIOM-2016-331    |                             |             | o             |
| 18 |                           | Namyang-myeon, Goheung-gun, Jeollanam-do, Korea           | KIOM201701018906 | o                           | o           | o             |
| 19 | <i>I. lacunosa</i>        | Gahoe-myeon, Hapcheon-gun, Gyeongsangnam-do, Korea        | KIOM-2016-324    |                             | o           | o             |
| 20 |                           | Boan-myeon, Buan-gun, Jeollabuk-do, Korea                 | KIOM201701018899 |                             | o           | o             |
| 21 |                           | Joseong-myeon, Boseong-gun, Jeollanam-do, Korea           | KIOM201701018921 | o                           | o           | o             |
| 22 | <i>I. triloba</i>         | Joseong-myeon, Boseong-gun, Jeollanam-do, Korea           | KIOM201701018922 |                             | o           | o             |
| 23 |                           | Joseong-myeon, Boseong-gun, Jeollanam-do, Korea           | KIOM201701018923 |                             | o           | o             |

**Table S2 Primers used in this study for CP junction validation**

| Primer name | Primer sequence (5'>3')  | Position |
|-------------|--------------------------|----------|
| IPOLI1F     | GGATGAGATTCCAAGGTCCTGATT | LSC_IRa  |
| IPOLI1R     | GTGGACAAGGGTCCCTGTTA     |          |
| IPOIS1F     | CGCCGCTTCAAGTATTGCTC     | IRa_SSC  |
| IPOIS1R     | CCTTTTCTGCCTCAAGTGCG     |          |
| IPOSI1F     | TCTTTGAAACCCGCTTCCGA     | SSC_IRb  |
| IPOSI1R     | CGCCGCTTCAAGTATTGCTC     |          |
| IPOIL1F     | CATCCATGGCTGAGTGGTGA     | IRb_LSC  |

**Table S3 PCR-based sequence validation of cp junctions**

| Species                                         | location | PCR-based sequence (bp) | CP sequence (bp) | start   | end     | Identities | %   |
|-------------------------------------------------|----------|-------------------------|------------------|---------|---------|------------|-----|
| <i>I. nil</i>                                   | LSC_IRa  | 122                     | 161,747          | 88,177  | 88,298  | 122/122    | 100 |
|                                                 | IRa_SSC  | 188                     |                  | 118,805 | 118,992 | 188/188    | 100 |
|                                                 | SSC_IRb  | 814                     |                  | 130,227 | 131,040 | 814/814    | 100 |
|                                                 | IRb_LSC  | 271                     |                  | 161,569 | 92      | 271/271    | 100 |
| <i>I. purpurea</i>                              | LSC_IRa  | 122                     | 161,629          | 88,213  | 88,334  | 122/122    | 100 |
|                                                 | IRa_SSC  | 206                     |                  | 118,757 | 118,962 | 206/206    | 100 |
|                                                 | SSC_IRb  | 812                     |                  | 130,196 | 131,007 | 812/812    | 100 |
|                                                 | IRb_LSC  | 270                     |                  | 161,452 | 92      | 270/270    | 100 |
| <i>I. hederacea</i>                             | LSC_IRa  | 122                     | 161,354          | 88,121  | 88,242  | 122/122    | 100 |
|                                                 | IRa_SSC  | 188                     |                  | 118,577 | 118,764 | 188/188    | 100 |
|                                                 | SSC_IRb  | 814                     |                  | 130,006 | 130,819 | 814/814    | 100 |
|                                                 | IRb_LSC  | 271                     |                  | 161,176 | 92      | 271/271    | 100 |
| <i>I. hederacea</i><br>var. <i>integriscula</i> | LSC_IRa  | 122                     | 161,714          | 88,163  | 88,284  | 122/122    | 100 |
|                                                 | IRa_SSC  | 188                     |                  | 118,778 | 118,965 | 188/188    | 100 |
|                                                 | SSC_IRb  | 814                     |                  | 130,207 | 131,020 | 814/814    | 100 |
|                                                 | IRb_LSC  | 271                     |                  | 161,536 | 92      | 271/271    | 100 |
| <i>I. lacunosa</i>                              | LSC_IRa  | 122                     | 161,492          | 87,656  | 87,777  | 122/122    | 100 |
|                                                 | IRa_SSC  | 188                     |                  | 118,437 | 118,610 | 188/188    | 100 |
|                                                 | SSC_IRb  | 793                     |                  | 129,843 | 130,635 | 793/793    | 100 |
|                                                 | IRb_LSC  | 294                     |                  | 161,317 | 119     | 294/294    | 100 |
| <i>I. triloba</i>                               | LSC_IRa  | 122                     | 161,750          | 87,654  | 87,775  | 122/122    | 100 |
|                                                 | IRa_SSC  | 188                     |                  | 118,577 | 118,750 | 188/188    | 100 |
|                                                 | SSC_IRb  | 791                     |                  | 129,973 | 130,763 | 791/791    | 100 |
|                                                 | IRb_LSC  | 263                     |                  | 161,587 | 99      | 263/263    | 100 |

**Table S4 Chloroplast genomes from NCBI used for phylogenetic analysis**

| No. | Family         | Taxon                                           | GenBank accession number |
|-----|----------------|-------------------------------------------------|--------------------------|
| 1   |                | <i>Ipomoea purpurea</i>                         | EU118126.1               |
| 2   |                | <i>Ipomoea batatas</i> cultivar <i>Xushu 18</i> | NC_026703.1              |
| 3   |                | <i>Ipomoea pes-tigridis</i>                     | KF242500.1               |
| 4   |                | <i>Ipomoea obscura</i>                          | KF242499.1               |
| 5   |                | <i>Ipomoea minutiflora</i>                      | KF242498.1               |
| 6   |                | <i>Ipomoea tricolor</i>                         | KF242495.1               |
| 7   |                | <i>Ipomoea ternifolia</i>                       | KF242494.1               |
| 8   |                | <i>Ipomoea setosa</i>                           | KF242492.1               |
| 9   |                | <i>Ipomoea polpha</i>                           | KF242491.1               |
| 10  |                | <i>Ipomoea pes-caprae</i>                       | KF242490.1               |
| 11  |                | <i>Ipomoea pedicellaris</i>                     | KF242489.1               |
| 12  |                | <i>Ipomoea orizabensis</i>                      | KF242488.1               |
| 13  |                | <i>Ipomoea nil</i>                              | KF242487.1               |
| 14  |                | <i>Ipomoea murucoides</i>                       | KF242486.1               |
| 15  | Convolvulaceae | <i>Ipomoea involucrata</i>                      | KF242485.1               |
| 16  |                | <i>Ipomoea hederifolia</i>                      | KF242484.1               |
| 17  |                | <i>Ipomoea eriocarpa</i>                        | KF242483.1               |
| 18  |                | <i>Ipomoea dumetorum</i>                        | KF242482.1               |
| 19  |                | <i>Ipomoea diamantinensis</i>                   | KF242481.1               |
| 20  |                | <i>Ipomoea cairica</i>                          | KF242480.1               |
| 21  |                | <i>Ipomoea argillicola</i>                      | KF242479.1               |
| 22  |                | <i>Ipomoea amnicola</i>                         | KF242478.1               |
| 23  |                | <i>Ipomoea splendor-sylvae</i>                  | KF242493.1               |
| 24  |                | <i>Ipomoea trifida</i>                          | KF242476.1               |
| 25  |                | <i>Ipomoea batatas</i>                          | KF242475.1               |
| 26  |                | <i>Ipomoea batatas</i>                          | KF242474.1               |
| 27  |                | <i>Ipomoea cordatotriloba</i>                   | KF242497.1               |
| 28  |                | <i>Ipomoea trifida</i>                          | NC_034670.1              |
| 29  |                | <i>Cuscuta exaltata</i>                         | EU189132.1               |
| 30  |                | <i>Cuscuta reflexa</i>                          | NC_009766.1              |
| 31  | Solanaceae     | <i>Nicotiana tabacum</i>                        | NC_001879.2              |
| 32  |                | <i>Capsicum annuum</i> var. <i>glabrusculum</i> | KJ619462.1               |

**Table S5 Raw reads and trimmed reads data**

| Scientific name         | Input reads | Trimmed reads |        | Total raw bases | Trimmed bases |        |
|-------------------------|-------------|---------------|--------|-----------------|---------------|--------|
| <i>Ipomoea nil</i>      | 4,573,202   | 3,628,472     | 79.34% | 1,358,210,596   | 843,982,036   | 62.14% |
| <i>Ipomoea purpurea</i> | 5,070,256   | 4,127,530     | 81.41% | 1,496,288,384   | 962,181,758   | 64.30% |



|                                                       |           |           |        |               |               |        |
|-------------------------------------------------------|-----------|-----------|--------|---------------|---------------|--------|
| <i>Ipomoea hederacea</i>                              | 5,464,740 | 4,340,128 | 79.42% | 1,624,707,998 | 1,011,823,016 | 62.28% |
| <i>Ipomoea hederacea</i> var.<br><i>integriuscula</i> | 4,578,130 | 3,637,141 | 79.45% | 1,359,746,277 | 847,364,988   | 62.32% |
| <i>Ipomoea lacunosa</i>                               | 4,564,630 | 3,661,941 | 80.22% | 1,355,877,695 | 857,378,293   | 63.23% |
| <i>Ipomoea triloba</i>                                | 4,452,482 | 3,455,730 | 77.61% | 1,323,463,129 | 799,351,956   | 60.40% |

**Table S6 Genome assembly information for six *Ipomoea* chloroplast genomes**

| Scientific name                                    | Aligned reads (#) | Coverage (x) | Cp genome length (bp) |
|----------------------------------------------------|-------------------|--------------|-----------------------|
| <i>Ipomoea nil</i>                                 | 310,901           | 443.10       | 161,747               |
| <i>Ipomoea purpurea</i>                            | 273,240           | 391.36       | 161,629               |
| <i>Ipomoea hederacea</i>                           | 427,231           | 611.58       | 161,354               |
| <i>Ipomoea hederacea</i> var. <i>integriuscula</i> | 269,581           | 384.78       | 161,714               |
| <i>Ipomoea lacunosa</i>                            | 352,038           | 503.72       | 161,492               |
| <i>Ipomoea triloba</i>                             | 277,309           | 390.00       | 161,750               |

**Table S7 Genic introns in six *Ipomoea* chloroplast genomes**

| <i>I. nil</i>       | Gene     | region | exon I | intron I | exon II | intron II | exon III |
|---------------------|----------|--------|--------|----------|---------|-----------|----------|
| 1                   | trnk-UUU | LSC    | 37     | 2548     | 35      |           |          |
| 2                   | rps16    | LSC    | 40     | 805      | 221     |           |          |
| 3                   | trnG-UCC | LSC    | 23     | 860      | 37      |           |          |
| 4                   | atpF     | LSC    | 144    | 699      | 411     |           |          |
| 5                   | rpoC1    | LSC    | 432    | 813      | 1611    |           |          |
| 6                   | ycf3     | LSC    | 126    | 726      | 228     | 770       | 153      |
| 7                   | trnL-UAA | LSC    | 35     | 361      | 34      |           |          |
| 8                   | trnV-UAC | LSC    | 38     | 586      | 37      |           |          |
| 9                   | rps12    | LSC    | 114    |          | 232     |           | 26       |
| 10                  | ClpP     | LSC    | 71     | 803      | 292     | 614       | 252      |
| 11                  | petB     | LSC    | 6      | 755      | 642     |           |          |
| 12                  | petD     | LSC    | 8      | 701      | 475     |           |          |
| 13                  | rpl16    | LSC    | 9      | 1025     | 435     |           |          |
| 14                  | ndhB     | IR     | 777    | 673      | 750     |           |          |
| 15                  | trnI-GAU | IR     | 42     | 927      | 35      |           |          |
| 16                  | trnA-UGC | IR     | 38     | 813      | 35      |           |          |
| 17                  | ndhA     | SSC    | 557    | 1443     | 541     |           |          |
| <i>I. purpurea</i>  | Gene     | region | exon I | intron I | exon II | intron II | exon III |
| 1                   | trnk-UUU | LSC    | 37     | 2563     | 35      |           |          |
| 2                   | rps16    | LSC    | 40     | 812      | 221     |           |          |
| 3                   | trnG-UCC | LSC    | 23     | 871      | 48      |           |          |
| 4                   | atpF     | LSC    | 144    | 698      | 411     |           |          |
| 5                   | rpoC1    | LSC    | 432    | 812      | 1611    |           |          |
| 6                   | ycf3     | LSC    | 126    | 726      | 228     | 770       | 153      |
| 7                   | trnL-UAA | LSC    | 35     | 362      | 34      |           |          |
| 8                   | trnV-UAC | LSC    | 38     | 586      | 37      |           |          |
| 9                   | rps12    | LSC    | 114    |          | 232     |           | 26       |
| 10                  | ClpP     | LSC    | 71     | 810      | 292     | 612       | 252      |
| 11                  | petB     | LSC    | 6      | 755      | 642     |           |          |
| 12                  | petD     | LSC    | 8      | 702      | 475     |           |          |
| 13                  | rpl16    | LSC    | 9      | 1019     | 435     |           |          |
| 14                  | ndhB     | IR     | 777    | 673      | 750     |           |          |
| 15                  | trnI-GAU | IR     | 42     | 927      | 35      |           |          |
| 16                  | trnA-UGC | IR     | 38     | 813      | 35      |           |          |
| 17                  | ndhA     | SSC    | 557    | 1432     | 541     |           |          |
| <i>I. hederacea</i> | Gene     | region | exon I | intron I | exon II | intron II | exon III |
| 1                   | trnk-UUU | LSC    | 37     | 2548     | 35      |           |          |
| 2                   | rps16    | LSC    | 40     | 810      | 221     |           |          |
| 3                   | trnG-UCC | LSC    | 23     | 860      | 48      |           |          |
| 4                   | atpF     | LSC    | 144    | 698      | 411     |           |          |
| 5                   | rpoC1    | LSC    | 432    | 812      | 1611    |           |          |
| 6                   | ycf3     | LSC    | 126    | 726      | 228     | 770       | 153      |
| 7                   | trnL-UAA | LSC    | 35     | 361      | 34      |           |          |
| 8                   | trnV-UAC | LSC    | 38     | 586      | 37      |           |          |

|                          |          |        |        |          |         |           |          |
|--------------------------|----------|--------|--------|----------|---------|-----------|----------|
| 9                        | rps12    | LSC    | 114    |          | 232     |           | 26       |
| 10                       | ClpP     | LSC    | 71     | 803      | 292     | 615       | 252      |
| 11                       | petB     | LSC    | 6      | 755      | 642     |           |          |
| 12                       | petD     | LSC    | 8      | 701      | 475     |           |          |
| 13                       | rpl16    | LSC    | 9      | 1025     | 435     |           |          |
| 14                       | ndhB     | IR     | 777    | 673      | 750     |           |          |
| 15                       | trnI-GAU | IR     | 42     | 927      | 35      |           |          |
| 16                       | trnA-UGC | IR     | 38     | 813      | 35      |           |          |
| 17                       | ndhA     | SSC    | 557    | 1443     | 541     |           |          |
| <hr/>                    |          |        |        |          |         |           |          |
| <i>I. hederacea</i>      |          |        |        |          |         |           |          |
| <i>var. integruscula</i> |          |        |        |          |         |           |          |
|                          | Gene     | region | exon I | intron I | exon II | intron II | exon III |
| 1                        | trnk-UUU | LSC    | 37     | 2548     | 35      |           |          |
| 2                        | rps16    | LSC    | 40     | 810      | 221     |           |          |
| 3                        | trnG-UCC | LSC    | 23     | 860      | 48      |           |          |
| 4                        | atpF     | LSC    | 144    | 698      | 411     |           |          |
| 5                        | rpoC1    | LSC    | 432    | 812      | 1611    |           |          |
| 6                        | ycf3     | LSC    | 126    | 726      | 228     | 770       | 153      |
| 7                        | trnL-UAA | LSC    | 35     | 361      | 34      |           |          |
| 8                        | trnV-UAC | LSC    | 38     | 586      | 37      |           |          |
| 9                        | rps12    | LSC    | 114    |          | 232     |           | 26       |
| 10                       | ClpP     | LSC    | 71     | 803      | 295     | 612       | 252      |
| 11                       | petB     | LSC    | 6      | 755      | 642     |           |          |
| 12                       | petD     | LSC    | 8      | 701      | 475     |           |          |
| 13                       | rpl16    | LSC    | 9      | 1025     | 435     |           |          |
| 14                       | ndhB     | IR     | 777    | 673      | 750     |           |          |
| 15                       | trnI-GAU | IR     | 42     | 927      | 35      |           |          |
| 16                       | trnA-UGC | IR     | 38     | 813      | 35      |           |          |
| 17                       | ndhA     | IR     | 557    | 1443     | 541     |           |          |
| <hr/>                    |          |        |        |          |         |           |          |
| <i>I. lacunosa</i>       |          |        |        |          |         |           |          |
|                          | Gene     | region | exon I | intron I | exon II | intron II | exon III |
| 1                        | trnk-UUU | LSC    | 37     | 2526     | 35      |           |          |
| 2                        | rps16    | LSC    | 40     | 819      | 221     |           |          |
| 3                        | trnG-UCC | LSC    | 23     | 873      | 48      |           |          |
| 4                        | atpF     | LSC    | 144    | 703      | 411     |           |          |
| 5                        | rpoC1    | LSC    | 432    | 829      | 1611    |           |          |
| 6                        | ycf3     | LSC    | 126    | 717      | 228     | 770       | 153      |
| 7                        | trnL-UAA | LSC    | 35     | 361      | 34      |           |          |
| 8                        | trnV-UAC | LSC    | 38     | 586      | 37      |           |          |
| 9                        | rps12    | LSC    | 114    |          | 232     |           | 26       |
| 10                       | ClpP     | LSC    | 71     | 793      | 295     | 608       | 252      |
| 11                       | petB     | LSC    | 6      | 756      | 642     |           |          |
| 12                       | petD     | LSC    | 8      | 706      | 475     |           |          |
| 13                       | rpl16    | LSC    | 9      | 1023     | 435     |           |          |
| 14                       | ndhB     | IR     | 777    | 673      | 750     |           |          |
| 15                       | trnI-GAU | IR     | 42     | 927      | 35      |           |          |
| 16                       | trnA-UGC | IR     | 38     | 813      | 35      |           |          |
| 17                       | ndhA     | IR     | 557    | 1428     | 541     |           |          |
| <hr/>                    |          |        |        |          |         |           |          |
| <i>I. triloba</i>        |          |        |        |          |         |           |          |
|                          | Gene     | region | exon I | intron I | exon II | intron II | exon III |
| 1                        | trnk-UUU | LSC    | 37     | 2535     | 35      |           |          |

|    |          |     |     |      |      |     |     |
|----|----------|-----|-----|------|------|-----|-----|
| 2  | rps16    | LSC | 40  | 819  | 221  |     |     |
| 3  | trnG-UCC | LSC | 23  | 873  | 48   |     |     |
| 4  | atpF     | LSC | 144 | 702  | 411  |     |     |
| 5  | rpoC1    | LSC | 432 | 828  | 1611 |     |     |
| 6  | ycf3     | LSC | 126 | 717  | 228  | 770 | 153 |
| 7  | trnL-UAA | LSC | 34  | 361  | 34   |     |     |
| 8  | trnV-UAC | LSC | 38  | 586  | 37   |     |     |
| 9  | rps12    | LSC | 114 |      | 232  |     | 26  |
| 10 | ClpP     | LSC | 71  | 793  | 292  | 612 | 252 |
| 11 | petB     | LSC | 6   | 756  | 642  |     |     |
| 12 | petD     | LSC | 8   | 701  | 475  |     |     |
| 13 | rpl16    | LSC | 9   | 1022 | 435  |     |     |
| 14 | ndhB     | IR  | 777 | 673  | 750  |     |     |
| 15 | trnI-GAU | IR  | 42  | 927  | 35   |     |     |
| 16 | trnA-UGC | IR  | 38  | 813  | 35   |     |     |
| 17 | ndhA     | IR  | 557 | 1426 | 541  |     |     |

**Table S8 Similarities between the chloroplast genomes of six *Ipomoea* species**

| Similarity                                       | <i>I. nil</i> | <i>I. purpurea</i> | <i>I. hederacea</i> | <i>I. hederacea</i><br>var. <i>interiuscula</i> | <i>I. lacunosa</i> | <i>I. triloba</i> |
|--------------------------------------------------|---------------|--------------------|---------------------|-------------------------------------------------|--------------------|-------------------|
| <i>I. nil</i>                                    | -             | 99.45%             | 99.85%              | 99.82%                                          | 98.82%             | 98.68%            |
| <i>I. purpurea</i>                               |               | -                  | 99.57%              | 99.44%                                          | 98.61%             | 98.52%            |
| <i>I. hederacea</i>                              |               |                    | -                   | 99.77%                                          | 98.62%             | 98.50%            |
| <i>I. hederacea</i> var.<br><i>integriuscula</i> |               |                    |                     | -                                               | 98.81%             | 98.69%            |
| <i>I. lacunosa</i>                               |               |                    |                     |                                                 | -                  | 99.72%            |
| <i>I. triloba</i>                                |               |                    |                     |                                                 |                    | -                 |
